# Supplementary material for: Cross-National Differences in Psychosocial Factors of Perinatal Depression: A Systematic Review of India and Japan
Source: MDPI journal article supplement (doi:10.3390/healthcare5040091), 2017-12-04
Supplement: s1 [file s1]

**Table S1.** Checklist of Inclusion Criteria.

|    |                                                                                                                                                          |     |                          |    |                          |
|----|----------------------------------------------------------------------------------------------------------------------------------------------------------|-----|--------------------------|----|--------------------------|
| a. | Study investigates related factors of perinatal depression among Indian or Japanese mothers                                                              | Yes | <input type="checkbox"/> | No | <input type="checkbox"/> |
| b. | Study targeted community dwelling mothers                                                                                                                | Yes | <input type="checkbox"/> | No | <input type="checkbox"/> |
| c. | Study is observational study                                                                                                                             | Yes | <input type="checkbox"/> | No | <input type="checkbox"/> |
| d. | Study is conducted in India or Japan (not abroad)                                                                                                        | Yes | <input type="checkbox"/> | No | <input type="checkbox"/> |
| e. | Study is either quantitative or qualitative design                                                                                                       | Yes | <input type="checkbox"/> | No | <input type="checkbox"/> |
| f. | Study is peer reviewed original research                                                                                                                 | Yes | <input type="checkbox"/> | No | <input type="checkbox"/> |
| g  | Quantitative study meets the minimum quality criteria;<br>g-1. clear description about study design                                                      | Yes | <input type="checkbox"/> | No | <input type="checkbox"/> |
|    | g-2. clear description about setting                                                                                                                     | Yes | <input type="checkbox"/> | No | <input type="checkbox"/> |
|    | g-3. clear description about eligible criterion and the participant numbers                                                                              | Yes | <input type="checkbox"/> | No | <input type="checkbox"/> |
|    | g-4. clear define all variables (outcomes, exposures, potential confounders.) depression should be assessed by validated measurements.                   | Yes | <input type="checkbox"/> | No | <input type="checkbox"/> |
|    | g-5. study conducted statistical analysis to identify related factors of perinatal depression.                                                           | Yes | <input type="checkbox"/> | No | <input type="checkbox"/> |
|    | g-6. clear description about characteristic of participants and main results (report unadjusted estimate of if applicable confounder-adjusted estimates) | Yes | <input type="checkbox"/> | No | <input type="checkbox"/> |
|    | g-7. study was approved by ethical committee.                                                                                                            | Yes | <input type="checkbox"/> | No | <input type="checkbox"/> |
